# Supplementary material for: Heart–lung interactions during neurally adjusted ventilatory assist
Source: Springer Nature journal article supplement (doi:10.1186/s13054-014-0499-8), 2014-09-11
Supplement: MOESM5 [file 9779606]

**Additional Table 1: Individual ventilator settings**

|                |                 |            | Pat 1 | Pat 2 | Pat 3 | Pat 4 | Pat 5 | Pat 6 | Pat 7 | Pat 8 | Pat 9 | Pat 10 | Mean±SD |      |
|----------------|-----------------|------------|-------|-------|-------|-------|-------|-------|-------|-------|-------|--------|---------|------|
| <b>PSVlow</b>  | FiO2            | %          | 40    | 40    | 35    | 40    | 45    | 40    | 60    | 45    | 50    | 50     | 45±7    |      |
|                | PEEP            | cmH2O      | 5     | 5     | 5     | 5     | 8     | 5     | 10    | 5     | 10    | 8      | 7±2     |      |
|                | PSV             | cmH2O      | 7     | 10    | 7     | 8     | 9     | 7     | 9     | 8     | 9     | 9      | 8±1     |      |
|                | mean Eadi       | uvol       | 1.4   | 0.6   | 4.0   | 2.9   | 10.5  | 3.8   | 1.0   | 3.7   | 4.5   | 4.4    | 4±3     |      |
|                | Flowtrigger     | l/min      | 5     | 5     | 5     | 5     | 5     | 2     | 6     | 5     | 5     | 7      | 5±1     |      |
|                | Insp rise       | sec        | 0.0   | 0.0   | 0.0   | 0.0   | 0.0   | 0.0   | 0.0   | 0.0   | 0.0   | 0.0    | 0.0±0   |      |
|                | cycling off     | % max flow | 30    | 30    | 30    | 30    | 25    | 30    | 20    | 30    | 30    | 30     | 10      | 27±7 |
|                | <b>PSVal</b>    | FiO2       | %     | 40    | 40    | 35    | 40    | 45    | 40    | 60    | 45    | 50     | 50      | 45±7 |
| PEEP           |                 | cmH2O      | 5     | 5     | 5     | 5     | 8     | 5     | 10    | 5     | 10    | 8      | 7±2     |      |
| PSV            |                 | cmH2O      | 14    | 20    | 14    | 16    | 18    | 14    | 18    | 16    | 18    | 18     | 17±2    |      |
| mean Eadi      |                 | uvol       | 0.5   | 0.4   | 2.9   | 1.2   | 5.8   | 2.3   | 0.4   | 1.5   | 2.2   | 2.3    | 2±2     |      |
| Flowtrigger    |                 | l/min      | 5     | 5     | 5     | 5     | 5     | 2     | 6     | 5     | 5     | 7      | 5±1     |      |
| Insp rise      |                 | sec        | 0.0   | 0.0   | 0.0   | 0.0   | 0.0   | 0.0   | 0.0   | 0.0   | 0.0   | 0.0    | 0.0±0   |      |
| cycling off    |                 | % max flow | 30    | 30    | 30    | 30    | 25    | 30    | 20    | 30    | 30    | 30     | 10      | 27±7 |
| <b>PSVhigh</b> |                 | FiO2       | %     | 40    | 40    | 35    | 40    | 45    | 40    | 60    | 45    | 50     | 50      | 45±7 |
|                | PEEP            | cmH2O      | 5     | 5     | 5     | 5     | 8     | 5     | 10    | 5     | 10    | 8      | 7±2     |      |
|                | PSV             | cmH2O      | 21    | 30    | 21    | 24    | 27    | 21    | 27    | 24    | 27    | 24     | 25±3    |      |
|                | mean Eadi       | uvol       | 0.5   | 0.3   | 1.7   | 1.1   | 0.7   | 0.7   | 0.4   | 0.7   | 0.6   | 1.2    | 1±0     |      |
|                | Flowtrigger     | l/min      | 5     | 5     | 5     | 5     | 5     | 2     | 6     | 5     | 5     | 7      | 5±1     |      |
|                | Insp rise       | sec        | 0.0   | 0.0   | 0.0   | 0.0   | 0.0   | 0.0   | 0.0   | 0.0   | 0.0   | 0.0    | 0.0±0   |      |
|                | cycling off     | % max flow | 30    | 30    | 30    | 30    | 25    | 30    | 20    | 30    | 30    | 30     | 10      | 27±7 |
|                | <b>NAVALow</b>  | FiO2       | %     | 40    | 40    | 35    | 40    | 45    | 40    | 60    | 45    | 50     | 50      | 45±7 |
| PEEP           |                 | cmH2O      | 5     | 5     | 5     | 5     | 8     | 5     | 10    | 5     | 10    | 8      | 7±2     |      |
| NAVA level     |                 | cmH2O/uvol | 1.5   | 1.1   | 2.1   | 2.6   | 1.5   | 1.2   | 1.8   | 1.8   | 0.9   | 1      | 1.6±0.5 |      |
| mean Eadi      |                 | uvol       | 1.9   | 1.8   | 3.6   | 3.5   | 8.5   | 3.5   | 3.5   | 5.0   | 7.7   | 6.1    | 5±2     |      |
| Flowtrigger    |                 | l/min      | 5     | 5     | 5     | 5     | 5     | 5     | 7     | 5     | 5     | 5      | 5±1     |      |
| Edi Trigger    |                 | uvol       | 0.5   | 0.5   | 0.5   | 0.5   | 0.5   | 0.5   | 0.3   | 0.3   | 0.5   | 0.5    | 0±0     |      |
| cycling off    |                 | % max Eadi | 70    | 70    | 70    | 70    | 70    | 70    | 70    | 70    | 70    | 70     | 70      | 27±7 |
| <b>NAVAal</b>  |                 | FiO2       | %     | 40    | 40    | 35    | 40    | 45    | 40    | 60    | 45    | 50     | 50      | 45±7 |
|                | PEEP            | cmH2O      | 5     | 5     | 5     | 5     | 8     | 5     | 10    | 5     | 10    | 8      | 7±2     |      |
|                | NAVA level      | cmH2O/uvol | 3     | 2.1   | 4.3   | 5.2   | 3     | 2.4   | 3.6   | 3.6   | 1.7   | 1.9    | 3.1±1.1 |      |
|                | mean Eadi       | uvol       | 1.8   | 1.6   | 3.2   | 2.4   | 6.0   | 3.9   | 2.1   | 4.0   | 5.6   | 5.2    | 4±2     |      |
|                | Flowtrigger     | l/min      | 5     | 5     | 5     | 5     | 5     | 5     | 7     | 5     | 5     | 5      | 5±1     |      |
|                | Edi Trigger     | uvol       | 0.5   | 0.5   | 0.5   | 0.5   | 0.5   | 0.5   | 0.3   | 0.3   | 0.5   | 0.5    | 0±0     |      |
|                | cycling off     | % max Eadi | 70    | 70    | 70    | 70    | 70    | 70    | 70    | 70    | 70    | 70     | 70      | 27±7 |
|                | <b>NAVAhigh</b> | FiO2       | %     | 40    | 40    | 35    | 40    | 45    | 40    | 60    | 45    | 50     | 50      | 45±7 |
| PEEP           |                 | cmH2O      | 5     | 5     | 5     | 5     | 8     | 5     | 10    | 5     | 10    | 8      | 7±2     |      |
| NAVA level     |                 | cmH2O/uvol | 6     | 3.6   | 7.3   | 8.6   | 12    | 4.8   | 7.2   | 4.8   | 3.4   | 2.4    | 6.0±2.9 |      |
| mean Eadi      |                 | uvol       | 1.5   | 1.0   | 2.3   | 2.4   | 2.4   | 2.8   | 1.6   | 3.6   | 3.8   | 8.5    | 3±2     |      |
| Flowtrigger    |                 | l/min      | 5     | 5     | 5     | 5     | 5     | 5     | 7     | 5     | 5     | 5      | 5±1     |      |
| Edi Trigger    |                 | uvol       | 0.5   | 0.5   | 0.5   | 0.5   | 0.5   | 0.5   | 0.3   | 0.3   | 0.5   | 0.5    | 0±0     |      |
| cycling off    |                 | % max Eadi | 70    | 70    | 70    | 70    | 70    | 70    | 70    | 70    | 70    | 70     | 70      | 27±7 |

**Additional Table 1**

This table contains the individual ventilator settings for all patients studied.

*Definition of abbreviations:* FiO2 = fraction of inspired oxygen, PEEP = positive end-expiratory pressure, PSV = pressure support ventilation, EAdi = electrical activity of the diaphragm, NAVA = neurally adjusted ventilatory assist, Insp rise = inspiratory rise time.
