# Supplementary material for: Heart–lung interactions during neurally adjusted ventilatory assist
Source: Springer Nature journal article supplement (doi:10.1186/s13054-014-0499-8), 2014-09-11
Supplement: MOESM7 [file 9779606]

**Additional Table 2.** Left Ventricular Echocardiography Data

|                                                                        | PSVlow    | PSVal    | PSVhigh   | NAVALow   | NAVAal   | NAVAhigh | level | p value* | interaction |
|------------------------------------------------------------------------|-----------|----------|-----------|-----------|----------|----------|-------|----------|-------------|
| <b>Doppler Flow Profile in the Left Ventricular Outflow Tract, n=7</b> |           |          |           |           |          |          |       |          |             |
| <b>values at end-expiration</b>                                        |           |          |           |           |          |          |       |          |             |
| Acceleration time, ms                                                  | 91 ± 13   | 95 ± 21  | 94 ± 14   | 98 ± 17   | 104 ± 26 | 91 ± 21  | 0.311 | 0.282    | 0.214       |
| Flow period, ms                                                        | 233 ± 24  | 236 ± 31 | 226 ± 27  | 232 ± 23  | 231 ± 25 | 234 ± 25 | 0.748 | 0.733    | 0.288       |
| Maximum flow velocity, meters per second                               | 0.9 ± 0.1 | 1 ± 0.2  | 0.8 ± 0.1 | 0.9 ± 0.1 | 1 ± 0.1  | 1 ± 0.1  | 0.499 | 0.623    | 0.252       |
| Velocity time integral, centimeters                                    | 16 ± 3    | 16 ± 4   | 15 ± 3    | 16 ± 3    | 17 ± 3   | 16 ± 4   | 0.068 | 0.567    | 0.54        |
| <b>values at end-inspiration</b>                                       |           |          |           |           |          |          |       |          |             |
| Acceleration time, ms                                                  | 96 ± 13   | 96 ± 20  | 99 ± 10   | 98 ± 17   | 110 ± 25 | 98 ± 18  | 0.334 | 0.185    | 0.059       |
| Flow period, ms                                                        | 227 ± 27  | 237 ± 32 | 231 ± 22  | 227 ± 20  | 232 ± 28 | 238 ± 25 | 0.23  | 0.687    | 0.403       |
| Maximum flow velocity, metres per second                               | 1 ± 0.1   | 1 ± 0.2  | 1 ± 0.1   | 1 ± 0.1   | 1 ± 0.1  | 1 ± 0.1  | 0.399 | 0.779    | 0.55        |
| Velocity time integral, centimetres                                    | 16 ± 2    | 17 ± 4   | 17 ± 3    | 16 ± 3    | 17 ± 3   | 16 ± 3   | 0.107 | 0.698    | 0.823       |
| <b>inspiratory values in % of expiratory values</b>                    |           |          |           |           |          |          |       |          |             |
| Acceleration time, %                                                   | 101 ± 6   | 106 ± 4  | 108 ± 8   | 106 ± 5   | 101 ± 5  | 106 ± 11 | 0.321 | 0.576    | 0.139       |
| Flow period, %                                                         | 100 ± 2   | 100 ± 3  | 102 ± 3   | 98 ± 2    | 100 ± 3  | 100 ± 3  | 0.242 | 0.065    | 0.264       |
| Maximum flow velocity, %                                               | 101 ± 1   | 103 ± 5  | 104 ± 2   | 102 ± 2   | 106 ± 5  | 110 ± 5  | 0.011 | 0.007    | 0.068       |
| Velocity time integral, %                                              | 102 ± 4   | 108 ± 4  | 111 ± 7   | 99 ± 3    | 103 ± 5  | 105 ± 5  | 0.005 | 0.011    | 0.485       |

**Additional Table 2:**

Doppler flow profiles in the left ventricular outflow tract could be obtained from seven patients. Absolute values at end-expiration did not differ between NAVA and PSV. To describe cyclic changes, the inspiratory values are given as a percentage of the corresponding expiratory value. Values are mean ± standard deviation. \*p values from repeated measures ANOVA (within subject factors: ventilation mode, support level)
